# Supplementary material
Source: publisher figshare collection journal article supplement (https://tandf.figshare.com/ndownloader/files/39646893)
Supplement: Supplementary file 1 [file 39646893]

| **Table S1**: Localities with different salinity values and GPS data. | | | |
| --- | --- | --- | --- |
| Locality | Salinity | Salinity EC | GPS |
| 1 | Low salinity | 2.0 dS/m | 41° 40' 09 N, 36° 01' 56 E |
| 2 | 3.9 dS/m | 41° 40' 12 N, 36° 02' 16 E |
| 3 | 4.2 dS/m | 41° 40' 11 N, 36° 02' 14 E |
| 4 | Medium salinity | 9.3 dS/m | 41° 40' 10 N, 36° 02' 10 E |
| 5 | 10.1 dS/m | 41° 40' 05 N, 36° 02' 19 E |
| 6 | 10.7 dS/m | 41° 40' 06 N, 36° 02' 21 E |
| 7 | High salinity | 18.4 dS/m | 41° 40' 10 N, 36° 02' 01 E |
| 8 | 23.5 dS/m | 41° 40' 07 N, 36° 01' 57 E |
| 9 | 26.2 dS/m | 41° 40' 11 N, 36° 02' 02 E |
